# Supplementary material for: Defining a core outcome set for adolescent and young adult patients with a spinal deformity: A collaborative effort for the Nordic Spine Surgery Registries
Source: PubMed Central journal article supplement — Acta Orthop. 2017 Sep 15;88(6):612–8. doi: 10.1080/17453674.2017.1371371 (PMC5694805; doi:10.1080/17453674.2017.1371371), 2017-09-15
Supplement: IORT_A_1371371_SM8555.pdf [file IORT_A_1371371_SM8555.pdf]

## Supplementary data

### Appendix 1: the Pubmed search strategy

“Spinal Curvatures”[Mesh] OR Spinal Curvature\*[tiab] OR Kyphosis[tiab] OR Scheuermann[tiab] OR Lordosis[tiab] OR Scoliosis[tiab] OR kyphoscoliosis[tiab] OR “spinal deformity”[tiab] OR “spinal deformities”[tiab]

AND

(“Surgical Procedures, Operative”[Mesh:NoExp] OR “Orthopedic Procedures”[Mesh:NoExp] OR “Surgical Fixation Devices”[Mesh:NoExp] OR “Orthopedic Fixation Devices”[Mesh] OR “Internal Fixators”[Mesh] OR “Arthrodesis”[Mesh] OR Surgery[tiab] OR surgical[tiab] OR operation[tiab] OR operative[tiab] OR correction[tiab] OR fixation[tiab] OR fixator\*[tiab])

AND

“adolescent idiopathic”[tiab] OR “Spondylitis, Ankylosing”[Mesh] OR Spondyloarthritis Ankylopoietica[tiab] OR Ankylosing Spondylarthritis[tiab] OR Ankylosing Spondylarthritis[tiab] OR Ankylosing Spondylarthritis[tiab] OR Ankylosing Spondylarthritis Ankylopoietica[tiab] OR Bechterew\*[tiab] OR “Marie-Struempell”[tiab] OR “Rheumatoid Spondylitis”[tiab] OR “Spondylitis Ankylopoietica”[tiab] OR “Ankylosing Spondyloarthritis”[tiab] OR “Ankylosing Spondyloarthritis”[tiab] OR “Muscular Atrophy, Spinal”[Mesh:NoExp] OR “Neurofibromatosis 1”[Mesh] OR ((Spine[tiab] OR spinal[tiab]) AND (“Muscular Atrophy”[tiab])) OR Neurofibroma\*[tiab] OR NF1[tiab] OR Recklinghausen\*[tiab] OR “Neuromuscular Diseases”[Mesh:NoExp] OR “Spinal Muscular Atrophies of Childhood”[Mesh] OR “Kugelberg-Welander”[tiab] OR “Werdnig Hoffman”[tiab] OR “Ehlers-Danlos Syndrome”[Mesh] OR “Ehlers-Danlos”[tiab] OR “Charcot-Marie-Tooth Disease”[Mesh] OR “Charcot-Marie-Tooth”[tiab] OR Peroneal Muscular atroph\*[tiab] OR “Roussy-Levy”[tiab] OR “Hereditary Areflexic Dystasia”[tiab] OR “Hereditary Motor and Sensory Neuropathy”[tiab] OR HMSN[tiab] OR “Prader-Willi Syndrome”[Mesh] OR “Prader-Willi”[tiab] OR “Labhart-Willi”[tiab] OR “Royer Syndrome”[tiab] OR “Royer’s Syndrome”[tiab] OR “Royers Syndrome”[tiab] OR “Osteogenesis Imperfecta”[Mesh] OR “Osteogenesis Imperfecta”[tiab] OR “Brittle Bone Disease”[tiab] OR “Fragilitas Ossium”[tiab] OR “Lobstein’s Disease”[tiab] OR “Cerebral Palsy”[Mesh] OR “Cerebral Palsy”[tiab] OR “Cerebral Palsies”[tiab] OR “Little Disease”[tiab] OR “Little’s Disease”[tiab] OR “Spastic Diplegia”[tiab] OR “Muscular Dystrophies”[Mesh] OR “Muscular dystrophy”[tiab] OR “Muscular dystrophies”[tiab] OR Myodystrophica\*[tiab] OR Myodystroph\*[tiab] OR “Dysautonomia, Familial”[Mesh] OR “Familial Dysautonomical”[tiab] OR “Hereditary Sensory and Autonomic Neuropathy”[tiab] OR “Hereditary Sensory Neuropathy”[tiab] OR HSAN[tiab] OR “Riley-Day Syndrome”[tiab] OR “CHARGE Syndrome”[Mesh] OR “CHARGE Syndrome”[tiab] OR “Hall-Hittner Syndrome”[tiab] OR “Friedreich Ataxia”[Mesh] OR “Friedreich Ataxia”[tiab] OR “Friedreich’s Ataxia”[tiab] OR “Hereditary Spinal Sclerosis”[tiab] OR “Hereditary Spinal Scleroses”[tiab] OR “Fragile X Syndrome”[Mesh] OR “Fragile X Syndrome”[tiab] OR “Martin-Bell Syndrome”[tiab] OR “Marker X Syndrome”[tiab] OR FRAXE Syndrome\*[tiab] OR FRAXA Syndrome\*[tiab] OR “Proteus Syndrome”[Mesh] OR “Proteus Syndrome”[tiab] OR “Proteus-Like Syndrome”[tiab] OR “Elephant Man Disease”[tiab] OR “Spinal Dysraphism”[Mesh] OR “Spinal Dysraphism”[tiab] OR “Spinal Bifida”[tiab] OR Spinal Dysraphia\*[tiab] OR Schistorrhachis[tiab] OR “Cleft Spine”[tiab] OR “Open Spine”[tiab] OR “Status Dysraphicus”[tiab] OR Rachischisis[tiab] OR Rachischises[tiab] OR “Marfan Syndrome”[Mesh] OR marfan\*[tiab] OR “Nail-Patella Syndrome”[Mesh] OR “Nail-Patella Syndrome”[tiab] OR Onychoostedysplasia[tiab] OR “Hereditary Osteo-Onychodysplasia”[tiab] OR “Hereditary Osteo-Onychodysplasias”[tiab] OR “Hereditary Onycho-Osteodysplasia”[tiab] OR “Pelvic Horn Syndrome”[tiab] OR “Turner-Kieser Syndrome”[tiab] OR “Fong Disease”[tiab] OR “Osterreicher Syndrome”[tiab] OR “Connective Tissue Diseases”[Mesh:NoExp] OR “Hernias, Diaphragmatic, Congenital”[Mesh] OR “Congenital diaphragmatic hernia”[tiab] OR “Congenital Diaphragmatic Hernias”[tiab] OR “Unilateral Agenesis of Diaphragm”[tiab] OR “Diaphragm Unilateral Ageneses”[tiab] OR “Diaphragm Unilateral Agenesis”[tiab] OR “Agenesis of Hemidiaphragm”[tiab] OR “Hemidiaphragm Ageneses”[tiab] OR “Hemidiaphragm Agenesis”[tiab] OR “Congenital Diaphragmatic Defect”[tiab] OR “Congenital Diaphragmatic Defects”[tiab] OR “Bochdalek Hernias”[tiab] OR “Morgagni Hernias”[tiab] OR “Morgagni’s Hernias”[tiab] OR “Morgagnis Hernias”[tiab] OR “Hemihyperplasia, Isolated” [Supplementary Concept] OR “Hemihyperplasia” [tiab] OR Hemihypertrophy[tiab] OR “Syringomyelia”[Mesh] OR Syringomyel\*[tiab] OR Myelosyringos\*[tiab] OR Morvan\*[tiab] OR Hydrosyringomyelia\*[tiab] OR “Mitral Valve Prolapse”[Mesh] OR “Mitral Valve”[tiab] OR “Click-Murmur Syndrome”[tiab] OR “Arnold-Chiari Malformation”[Mesh] OR “Arnold-Chiari”[tiab] OR “Chiari Malformation”[tiab] OR “Amniotic Band Syndrome”[Mesh] OR “amniotic band”[tiab] OR “Streeter Syndrome”[tiab] OR “Intrauterine Ring Constriction”[tiab] OR “Intrauterine Ring Constrictions”[tiab] OR Annular Groove\*[tiab] OR “Intrauterine Amputation”[tiab] OR “Intrauterine Amputations”[tiab] OR “VACTERL hydrocephaly” [Supplementary Concept] OR “VACTERL association” [Supplementary Concept] OR vacterl[tiab] OR “Sotos Syndrome”[Mesh] OR “Sotos”[tiab] OR “Cerebral Gigantism”[tiab] OR “Cerebral Gigantisms”[tiab]

### Appendix 2: Items of the methodological quality assessment according to the GRADE working group

- Were inclusion and exclusion criteria for being in the study prespecified and applied uniformly to all participants?
- Were the outcome measures clearly defined, valid, reliable, and implemented consistently across all study participants?
- Was baseline value for the outcome(s) measured and was the statistical analyses adjusted for the baseline value (s) of the outcome measure(s)?
- Was loss to follow-up after baseline 20% or less?

### Appendix 3: Potential core domains derived from the literature, categorized within the 4 chapters of the ICF

#### Body function and structures

| ICF chapters and potential core domains                                                                                                              | Definition                                                                                                                                                                                                                                                          |
|------------------------------------------------------------------------------------------------------------------------------------------------------|---------------------------------------------------------------------------------------------------------------------------------------------------------------------------------------------------------------------------------------------------------------------|
| Balance                                                                                                                                              | The patient's ability to maintain bodily equilibrium                                                                                                                                                                                                                |
| Ambulatory status                                                                                                                                    | Walking ability (e.g. walking without or with restrictions, with assistive device, wheelchair)                                                                                                                                                                      |
| Cognitive abilities                                                                                                                                  | The patient's ability of performing the mental process of knowing, including aspects such as awareness, perception, reasoning, and judgment                                                                                                                         |
| Comfort                                                                                                                                              | The patient's experience of a feeling of pleasurable physical ease                                                                                                                                                                                                  |
| Curve progression                                                                                                                                    | Progression of the curve after surgery to latest follow-up.                                                                                                                                                                                                         |
| Loss of correction                                                                                                                                   | How much loss of correction over time occurs, from first postoperative measurement to final follow-up.                                                                                                                                                              |
| Mental health<br>Subdomains:<br>• Need for psychological treatment                                                                                   | A state of well-being in which every individual realizes his or her own potential, can cope with the normal stresses of life, can work productively and fruitfully, and is able to make a contribution to her or his community.                                     |
| Muscle strength                                                                                                                                      | Force generated by the contraction of a muscle or of a group of muscles of the body                                                                                                                                                                                 |
| Nutritional status                                                                                                                                   | Patient's nutritional status                                                                                                                                                                                                                                        |
| Pain intensity<br>Subdomains:<br>• Pain medication: type, dosage, and duration                                                                       | How much a patient hurts, reflecting the overall magnitude of the pain experience                                                                                                                                                                                   |
| Psychological function<br>Subdomains:<br>• Mood<br>• Self-esteem<br>• Self-image                                                                     | Patient's levels of anxiety, depression and anger. Anxiety refers to fear, extreme worrying and hyperarousal symptoms. Depression refers to negative mood, loss of self-confidence, loss of motivation and enjoyment. Anger refers to irritability and frustration. |
| Range of motion                                                                                                                                      | Quantity of movement of the spine and/or of other body parts.                                                                                                                                                                                                       |
| Sleep function                                                                                                                                       | The onset, maintenance, quality, amount of sleep, and functions involving the sleep cycle, perceptions of alertness and sleepiness during waking hours                                                                                                              |
| Physical function<br>Subdomains:<br>• Mobility: lower extremity function<br>• Dexterity: upper extremity function<br>• Axial: neck and back function | Any movement at the level of the person that involves the integration of multiple body systems and structures. This involves basic skills like reaching, standing, sitting, transferring positions etc.                                                             |
| Gait                                                                                                                                                 | Movement patterns associated with walking, running or other whole body movements                                                                                                                                                                                    |
| Pulmonary function                                                                                                                                   | How well the lungs take in and release air and how well they move gases such as oxygen from the atmosphere into the body's circulation                                                                                                                              |

#### Activities and participation

| ICF chapters and potential core domains                                                                                                                                                                                                                                                                                                                                                                                                                                                                             | Definition                                                                                                                                                                                                            |
|---------------------------------------------------------------------------------------------------------------------------------------------------------------------------------------------------------------------------------------------------------------------------------------------------------------------------------------------------------------------------------------------------------------------------------------------------------------------------------------------------------------------|-----------------------------------------------------------------------------------------------------------------------------------------------------------------------------------------------------------------------|
| Family relations                                                                                                                                                                                                                                                                                                                                                                                                                                                                                                    | Creating and maintaining close or kinship relationships with members of the nuclear family, extended family, foster or adopted family, or legal guardians                                                             |
| Immobilisation                                                                                                                                                                                                                                                                                                                                                                                                                                                                                                      | Need and type of immobilisation postoperatively                                                                                                                                                                       |
| Leisure activity functioning                                                                                                                                                                                                                                                                                                                                                                                                                                                                                        | The patient's ability to engage in any form of play, recreational or leisure activity                                                                                                                                 |
| Pain interference                                                                                                                                                                                                                                                                                                                                                                                                                                                                                                   | Consequences of pain on relevant aspects of a patient's life and may include the impact of pain on social, cognitive, emotional, physical and recreational activities as well as sleep and enjoyment in life          |
| Participation                                                                                                                                                                                                                                                                                                                                                                                                                                                                                                       | Involvement in a life situation                                                                                                                                                                                       |
| Physical functioning                                                                                                                                                                                                                                                                                                                                                                                                                                                                                                | Patient's ability to carry out daily physical activities required to meet basic needs, ranging from self-care to more complex activities that require a combination of skills.                                        |
| Social functioning                                                                                                                                                                                                                                                                                                                                                                                                                                                                                                  | Patient's ability to interact with people in a contextually and socially appropriate manner                                                                                                                           |
| Workability                                                                                                                                                                                                                                                                                                                                                                                                                                                                                                         | Ability to meet physical and/or psychological work and/or school demands                                                                                                                                              |
| HRQoL (subdomain)                                                                                                                                                                                                                                                                                                                                                                                                                                                                                                   | Well-being reflecting subjective or objective judgement concerning health related aspects of an individual's existence                                                                                                |
| Overall quality of life                                                                                                                                                                                                                                                                                                                                                                                                                                                                                             | General well-being reflecting subjective or objective judgement concerning all aspects of an individual's existence, including health, economic, political, cultural, environmental, aesthetic and spiritual aspects. |
| Satisfaction<br>Subdomains:<br>• Satisfaction with treatment services: patient's satisfaction with care received, including treatment and care providers.<br>• Satisfaction with cosmetic result: patient's satisfaction with the cosmetic result of surgery<br>• Satisfaction with surgery (overall): patient's rating of global satisfaction with surgery<br>• Satisfaction with social roles and activities: patient's satisfaction in performing usual social roles and activities (including family and work). | Fulfillment of one's wishes, expectations, or needs, or the pleasure derived from this.                                                                                                                               |
| Sexual functioning                                                                                                                                                                                                                                                                                                                                                                                                                                                                                                  | Patient's ability to conduct physical and mental functions related to the sexual act                                                                                                                                  |

**Environmental factors**

| ICF chapters and potential core domains | Definition                                                                                                                                                                                                          |
|-----------------------------------------|---------------------------------------------------------------------------------------------------------------------------------------------------------------------------------------------------------------------|
| Appearance                              | The way a patient looks on the outside, judged by others                                                                                                                                                            |
| Ease of care giving                     | Physical effort, and time consumption of caregiver to fulfill the care needs of the patient                                                                                                                         |
| QoL of care giver                       | General well-being reflecting subjective or objective judgement concerning all aspects of the caregivers existence, including health, economic, political, cultural, environmental, aesthetic and spiritual aspects |
| Surgeon's satisfaction                  | Satisfaction of the surgeon with the result of the surgery.                                                                                                                                                         |
| Healthcare costs                        | Total costs associated with the treatment                                                                                                                                                                           |
| 30-day readmission                      | Percentage of patients readmitted to the hospital within 30 days postoperatively                                                                                                                                    |
| Adverse events                          | Any untoward medical occurrence in a patient or clinical investigation subject treated with any other form of therapy and which does not necessarily have to have a causal relationship with this treatment         |
| Complications                           | An unanticipated problem that arises following, and is a result of, a procedure, treatment, or illness.                                                                                                             |
| Number of deaths                        | Report of the number of deaths due to surgery.                                                                                                                                                                      |
| Length of hospitalisation               | Total length of hospitalisation, from initial hospitalisation to discharge                                                                                                                                          |
| Length of ICU stay                      | Total length of Intensive Care Unit stay.                                                                                                                                                                           |
| Rehospitalisation                       | Total length of rehospitalisation, from initial rehospitalisation to discharge                                                                                                                                      |
| Re-operations                           | The quantity of reoperations needed after the primary operation                                                                                                                                                     |

## Appendix 4: Discussion in Round 1

| Domain                              | Discussion                                                                                                                                                                                                                                                                                                                                                                                                                                   | Level of consensus achieved |          |
|-------------------------------------|----------------------------------------------------------------------------------------------------------------------------------------------------------------------------------------------------------------------------------------------------------------------------------------------------------------------------------------------------------------------------------------------------------------------------------------------|-----------------------------|----------|
|                                     |                                                                                                                                                                                                                                                                                                                                                                                                                                              | Not in favor                | In favor |
| <b>Body function and structures</b> |                                                                                                                                                                                                                                                                                                                                                                                                                                              |                             |          |
| Balance                             | Would be more relevant for patients with neuromuscular disorders.                                                                                                                                                                                                                                                                                                                                                                            | 7                           | 0        |
| Ambulatory status                   |                                                                                                                                                                                                                                                                                                                                                                                                                                              | 7                           | 0        |
| Cognitive abilities                 |                                                                                                                                                                                                                                                                                                                                                                                                                                              | 7                           | 0        |
| Comfort                             |                                                                                                                                                                                                                                                                                                                                                                                                                                              | 2                           | 5        |
| Curve progression                   | Contributing factor. This is not an outcome from the patient's perspective. This is more important for the surgeon. 7: Curve progression. No Core Outcome Set (COS), but probably contributing factor. Though, patients want to see the radiograph, because they know it is the decisive factor for surgery.                                                                                                                                 | 4                           | 3        |
| Loss of correction                  | 8: Secondary outcome                                                                                                                                                                                                                                                                                                                                                                                                                         | 5                           | 2        |
| Mental health                       | By improving the patient's QoL we are improving their mental health. Physical appearance can really influence overall mental health (secondary outcome).                                                                                                                                                                                                                                                                                     | 0                           | 7        |
| Muscle strength                     |                                                                                                                                                                                                                                                                                                                                                                                                                                              | 7                           | 0        |
| Nutritional status                  |                                                                                                                                                                                                                                                                                                                                                                                                                                              | 7                           | 0        |
| Pain intensity                      |                                                                                                                                                                                                                                                                                                                                                                                                                                              | 0                           | 7        |
| Psychological function              | How does this differ from "mental health"? There seems to be a huge overlap. The subdomains are relevant and should be explored in subsequent rounds. 12: What is the difference with the 'mental health' domain? Anxiety, depression and anger removed? → Change the subdomains to separate domains, in that way we have 'mental health' next to these additional domains.                                                                  | 0                           | 7        |
| Range of motion                     |                                                                                                                                                                                                                                                                                                                                                                                                                                              | 7                           | 0        |
| Sleep function                      |                                                                                                                                                                                                                                                                                                                                                                                                                                              | 7                           | 0        |
| Physical function                   | Confused with "Range of motion"                                                                                                                                                                                                                                                                                                                                                                                                              | 3                           | 4        |
| Gait                                |                                                                                                                                                                                                                                                                                                                                                                                                                                              | 7                           | 0        |
| Pulmonary function                  | This needs to be captured somewhere and is relevant. However, based on the way the definition is currently worded, it is not. The definition should be changed. 17: Not correctly defined, now it is defined as a pure physiological value. → Revise definition or include in 'physical function' domain.                                                                                                                                    | 1                           | 6        |
| <b>Activities and participation</b> |                                                                                                                                                                                                                                                                                                                                                                                                                                              |                             |          |
| Family relations                    |                                                                                                                                                                                                                                                                                                                                                                                                                                              | 7                           | 0        |
| Immobilisation                      |                                                                                                                                                                                                                                                                                                                                                                                                                                              | 7                           | 0        |
| Leisure activity functioning        |                                                                                                                                                                                                                                                                                                                                                                                                                                              | 0                           | 7        |
| Pain interference                   | Pain appeared before                                                                                                                                                                                                                                                                                                                                                                                                                         | 0                           | 7        |
| Participation                       | How does this differ from leisure activities? We do not need to measure all aspects of participation, do we? 22: There is confusion about the definition. Definition is too broad, we do not want to measure all life situations. → Revise definition.                                                                                                                                                                                       | 7                           | 0        |
| Physical functioning                | 0                                                                                                                                                                                                                                                                                                                                                                                                                                            | 7                           | 0        |
| Social functioning                  | What about the subdomains?                                                                                                                                                                                                                                                                                                                                                                                                                   | 7                           | 0        |
| Workability                         | 0                                                                                                                                                                                                                                                                                                                                                                                                                                            | 7                           | 0        |
| HRQoL (subdomain)                   | 26: Further clarification of the difference between 'overall quality of life' and the subdomain 'health-related quality of life' is needed. → Question is split into 26a and 26b. 26a: 'health-related quality of life' 26b: 'overall quality of life'                                                                                                                                                                                       | 0                           | 7        |
| Overall quality of life             |                                                                                                                                                                                                                                                                                                                                                                                                                                              | 7                           | 0        |
| Satisfaction                        | There was controversy about whether or not this should be a core outcome. The subdomains should be explored. Cosmetic satisfaction is important and should be considered. 27: Satisfaction with cosmetic result of surgery is important! → Report this subdomain separately. 'Satisfaction with surgery' should be 'satisfaction with outcome of surgery'.                                                                                   | 5                           | 2        |
| Sexual functioning                  |                                                                                                                                                                                                                                                                                                                                                                                                                                              | 4                           | 3        |
| <b>Environmental factors</b>        |                                                                                                                                                                                                                                                                                                                                                                                                                                              |                             |          |
| Appearance                          |                                                                                                                                                                                                                                                                                                                                                                                                                                              | 6                           | 1        |
| Ease of care giving                 |                                                                                                                                                                                                                                                                                                                                                                                                                                              | 7                           | 0        |
| QoL of care giver                   |                                                                                                                                                                                                                                                                                                                                                                                                                                              | 7                           | 0        |
| Surgeon's satisfaction              |                                                                                                                                                                                                                                                                                                                                                                                                                                              | 7                           | 0        |
| Healthcare costs                    |                                                                                                                                                                                                                                                                                                                                                                                                                                              | 7                           | 0        |
| 30-day readmission                  | Proxy for adverse events. 34: No COS, but probably contributing factor.                                                                                                                                                                                                                                                                                                                                                                      | 7                           | 0        |
| Adverse events                      | After carefully re-reading the definition, consensus was achieved. 35: No Core Outcome Set (COS), but probably contributing factor. Adverse events are very hard to measure because definitions differ.                                                                                                                                                                                                                                      | 7                           | 0        |
| Complications                       | The group was confused between adverse events and complications. Complications are related to the procedure and sometimes reported complications are often false/incorrect. The group decided to postpone voting on this domain until the next round. 36: No Core Outcome Set (COS), but probably contributing factor. Are very hard to measure because definitions differ → Voting not performed, experts want information from literature. | 7                           | 0        |
| Number of deaths                    |                                                                                                                                                                                                                                                                                                                                                                                                                                              | 7                           | 0        |
| Length of hospitalisation           | 38: No Core Outcome Set (COS), but probably contributing factor.                                                                                                                                                                                                                                                                                                                                                                             | 7                           | 0        |
| Length of ICU stay                  |                                                                                                                                                                                                                                                                                                                                                                                                                                              | 7                           | 0        |
| Rehospitalisation                   |                                                                                                                                                                                                                                                                                                                                                                                                                                              | 6                           | 1        |
| Re-operations                       |                                                                                                                                                                                                                                                                                                                                                                                                                                              | 0                           | 7        |

QOL = quality of life HRQOL= health-related quality of life ICU= intensive care unit

### Appendix 5: Clinimetric properties

Clinimetric properties of the patient reported measurement instruments derived from the literature review. Highlighted are the SRS22r and EQ5D which were selected for implementation in the registries

|                | Content validity | Internal consistency | Criterion validity | Construct validity | Agreement | Reliability | Responsiveness | Floor or ceiling effect | Interpretability |
|----------------|------------------|----------------------|--------------------|--------------------|-----------|-------------|----------------|-------------------------|------------------|
| ODI            | ?+               | +++                  | o                  | ++                 | o         | +           | o              | o                       | o                |
| <b>SRS-22r</b> | <b>+</b>         | <b>+</b>             | <b>+</b>           | <b>++?</b>         | <b>++</b> | <b>?</b>    | <b>+</b>       | <b>+</b>                | <b>o</b>         |
| VAS            | ?                | o                    | o                  | +++                | +         | +           | +              | o                       | o                |
| NRS            | ?                | o                    | o                  | ++                 | +         | o           | +              | o                       | o                |
| SF-36          | ?                | +                    | o                  | ??                 | ?         | ?           | +              | ?-                      | o                |
| SRS-24         | ?                | +?-                  | o                  | -                  | ?         | ?           | ?              | -                       | o                |
| SF-12          | o                | o                    | o                  | o                  | o         | o           | o              | o                       | o                |
| SRS-30         | -                | ?                    | o                  | o                  | o         | o           | o              | +                       | o                |
| JOACME         | o                | ?                    | ?                  | -                  | o         | ?           | +              | +                       | o                |
| LBOS           | o                | +                    | o                  | +                  | o         | ?           | -              | -                       | o                |
| RMDQ           | o                | +                    | o                  | +                  | o         | +           | +              | +                       | o                |
| NDI            | +                | +                    | o                  | ?                  | ?         | ?           | ?-             | -                       | +                |
| McGill         | -                | +                    | o                  | -                  | o         | ?           | +              | o                       | +                |
| DPS            | o                | o                    | o                  | o                  | o         | o           | o              | o                       | o                |
| AIMS           | o                | o                    | o                  | o                  | o         | o           | o              | o                       | o                |
| JOABPE         | ?                | +                    | o                  | ?                  | o         | -           | o              | +                       | +                |
| BASDAI         | -                | +                    | ?                  | -                  | o         | +           | +              | +                       | o                |
| AAOS-LMS       | o                | +                    | o                  | ?                  | o         | +           | o              | o                       | o                |
| <b>EQ-5D</b>   | <b>o</b>         | <b>o</b>             | <b>o</b>           | <b>o</b>           | <b>o</b>  | <b>o</b>    | <b>o</b>       | <b>o</b>                | <b>o</b>         |
| S-ESR          | o                | o                    | o                  | o                  | o         | o           | o              | o                       | o                |
| TAPS           | +                | +                    | o                  | -                  | +         | +           | o              | +                       | o                |
| SAQ            | +                | ++++                 | +                  | +                  | ++        | +           | ++?            | ++?                     | o                |
| SGRQ           | o                | o                    | o                  | o                  | o         | o           | o              | o                       | o                |
| QLPSD          | +                | +                    | +                  | +                  | o         | o           | -              | o                       | o                |
| WRVAS          | o                | +                    | o                  | ?                  | o         | +           | o              | ?                       | o                |
| SQLI           | o                | +                    | o                  | +                  | +         | +           | o              | o                       | o                |

+ = positive; ? = doubtful ; - = poor; o = no studies found/ yet to be studied.  
 Multiple +, ?, -, o indicates that multiple studies have assessed this clinimetric property.  
 ODI = Oswestry Disability Index; SRS-22/24/30 = Scoliosis Research Society questionnaires; VAS = Visual Analog Scale;  
 NRS = Numeric Rating Scale; SF-36 = Short Form 36; SF-12 = Short Form 12;  
 JOACME = Japanese Orthopaedic Association Cervical Myelopathy Evaluation; LBOS = Low Back Outcome Score;  
 RMSQ = Roland Morris Disability Questionnaire; NDI = Neck Disability Index; SF-McGill = Short Form McGill Questionnaire;  
 DPS = Denis Pain Scale; AIMS = Arthritis Impact Measurement Scale; JOABPE = JOA Back Pain Evaluation Questionnaire;  
 BASDAI = Bath Ankylosing Spondylitis Disease Activity Index; EQ-5D = EuroQol 5D; S-ESR = Self-Esteem Scale by Rosenberg;  
 TPAS = Trunk Appearance Perception Scale; SAQ = Spinal Appearance Questionnaire; SGRQ = St. George's Respiratory Questionnaire;  
 QLSPD = The Quality of Life Profile for Spine Deformities; WRVAS = Walter Reed Visual Assessment Scale;  
 SQLI = Scoliosis Quality of Life Index.

## Appendix 6: Assessment of feasibility

Assessment of feasibility of implementation of the patient reported measurements instruments derived from the literature review. Highlighted are the SRS22-r and EQ5D which were selected for implementation in the registries

| Instrument     | Items     | Minutes to complete | Translated (and validated) in Nordic languages    | License fee                       |
|----------------|-----------|---------------------|---------------------------------------------------|-----------------------------------|
| ODI            | 10        | 5                   | Dutch, Danish, Finnish, Norwegian, Swedish        |                                   |
| <b>SRS-22r</b> | <b>22</b> | <b>&lt; 10</b>      | <b>Dutch, Danish, Finnish, Norwegian, Swedish</b> |                                   |
| VAS            | 1         | < 1                 | oo                                                |                                   |
| NRS            | 1         | < 1                 | oo                                                |                                   |
| SF-36          | 36        | > 10                | Dutch, Danish, Finnish, Norwegian, Swedish        | yes                               |
| SRS-24         | 24        | < 10                | Dutch, Danish, Finnish, Norwegian, Swedish        |                                   |
| SF-12          | 12        | < 2                 | Dutch, Danish, Finnish, Norwegian, Swedish        | yes                               |
| SRS-30         | 30        | < 10                | N/A?                                              |                                   |
| JOACME         | 28        | < 10                | N/A?                                              |                                   |
| LBOS           | 13        | 5                   | German and Spanish                                |                                   |
| RMDQ           | 24        | 5                   | Dutch, Danish, Finnish, Norwegian, Swedish        |                                   |
| NDI            | 10        | 5                   | Dutch, Danish, Finnish, Norwegian, Swedish        |                                   |
| SF-McGill      | 15        | 2–5                 | Dutch, Danish, Finnish, Norwegian, Swedish        |                                   |
| DPS            | 1         | 1                   | N/A                                               |                                   |
| AIMS           | 45        | 15                  | Dutch, Danish, Finnish, Norwegian, Swedish        |                                   |
| JOABPE         | 28        | <10                 | N/A?                                              |                                   |
| BASDAI         | 6         | <2                  | Dutch, Danish, Finnish, Norwegian, Swedish        |                                   |
| <b>EQ-5D</b>   | <b>6</b>  | <b>Few</b>          | <b>Dutch, Danish, Finnish, Norwegian, Swedish</b> | <b>Not for non-commercial use</b> |
| S-ESR          | 10        | Few                 | Dutch, Danish, Finnish, Norwegian, Swedish        |                                   |
| TPAS           | 3         | < 1                 | oo                                                |                                   |
| SAQ            | 20        | < 10                | oo                                                |                                   |
| SGRQ           | 16        | 8–15                | Dutch, Danish, Finnish, Norwegian, Swedish        |                                   |
| QLPSD          | 21        | < 10                | N/A                                               |                                   |
| WRVAS          | 7         | < 5                 | oo                                                |                                   |
| SQLI           | 21        | < 10                | Danish                                            |                                   |

All measurement instruments are available in the English language.

N/A = Not applicable.

oo = no text items.

ODI = Oswestry Disability Index; SRS-22/24/30 = Scoliosis Research Society questionnaires; VAS = Visual Analog Scale;

NRS = Numeric Rating Scale; SF-36 = Short Form 36; SF-12 = Short Form 12;

JOACME = Japanese Orthopaedic Association Cervical Myelopathy Evaluation; LBOS = Low Back Outcome Score;

RMSQ = Roland Morris Disability Questionnaire; NDI = Neck Disability Index; SF-McGill = Short Form McGill Questionnaire;

DPS = Denis Pain Scale; AIMS = Arthritis Impact Measurement Scale; JOABPE = JOA Back Pain Evaluation Questionnaire;

BASDAI = Bath Ankylosing Spondylitis Disease Activity Index; EQ-5D = EuroQol 5D; S-ESR = Self-Esteem Scale by Rosenberg;

TPAS = Trunk Appearance Perception Scale; SAQ = Spinal Appearance Questionnaire;

SGRQ = St. George's Respiratory Questionnaire; QLSPD = The Quality of Life Profile for Spine Deformities;

WRVAS = Walter Reed Visual Assessment Scale; SQLI = Scoliosis Quality of Life Index.
